# Supplementary material
Source: Springer Nature journal article supplement (https://www.springermedizin.de/resource/supplementary/12878_2008_34_MOESM6_ESM.pdf/9441736)

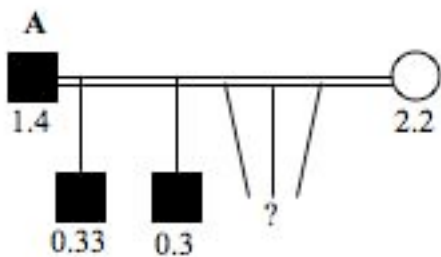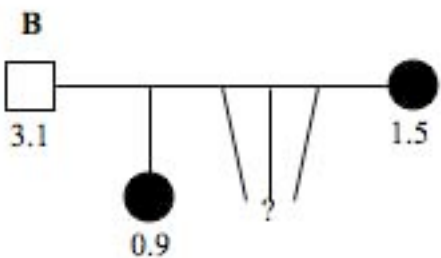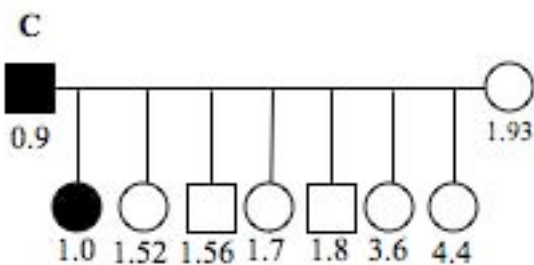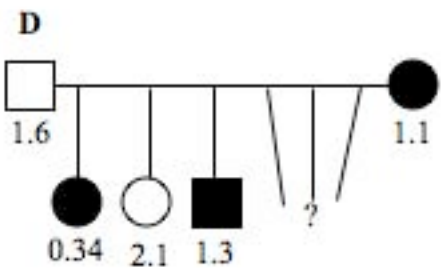

Supplement: MOESM6 [file 9441736]
